# Supplementary figures and images for: Plasma membrane calcium ATPase required for semicircular canal formation and otolith growth in the zebrafish inner ear
Source: Oxford University Press journal article supplement (doi:10.1242/jeb.022798), 2009-02-13

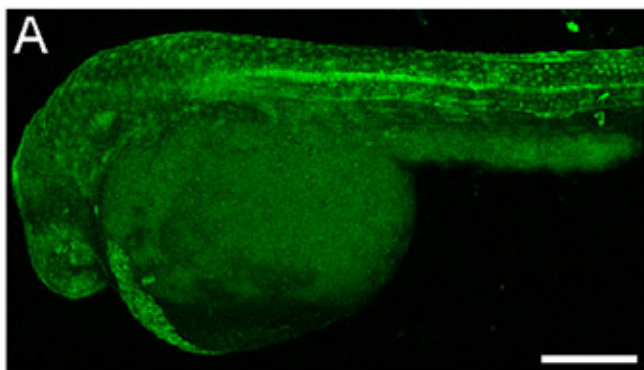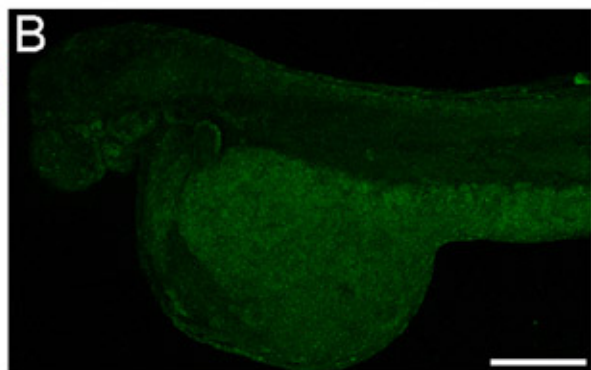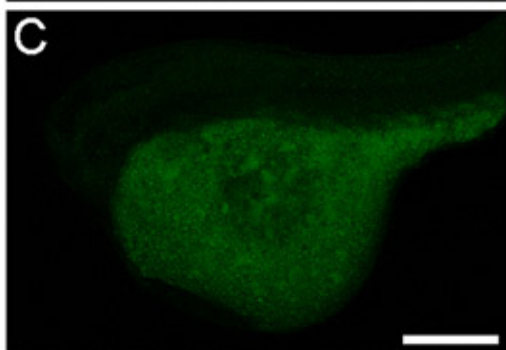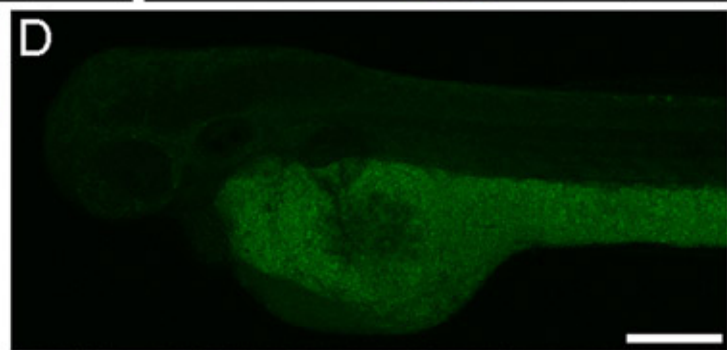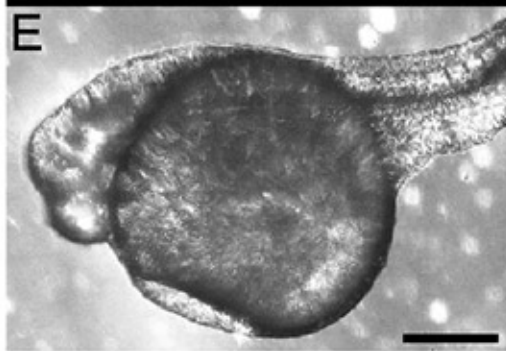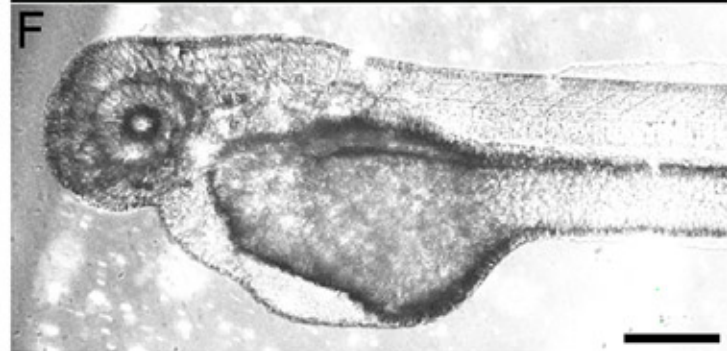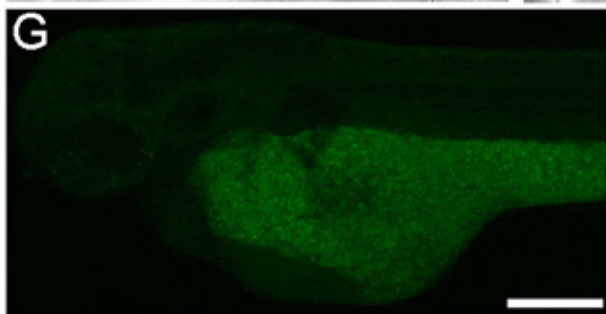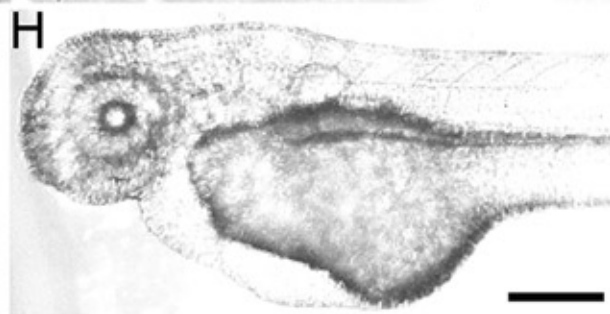

Supplement: jeb022798-sup-022798-figs1.pdf [file jeb022798-sup-022798-figs1.pdf]

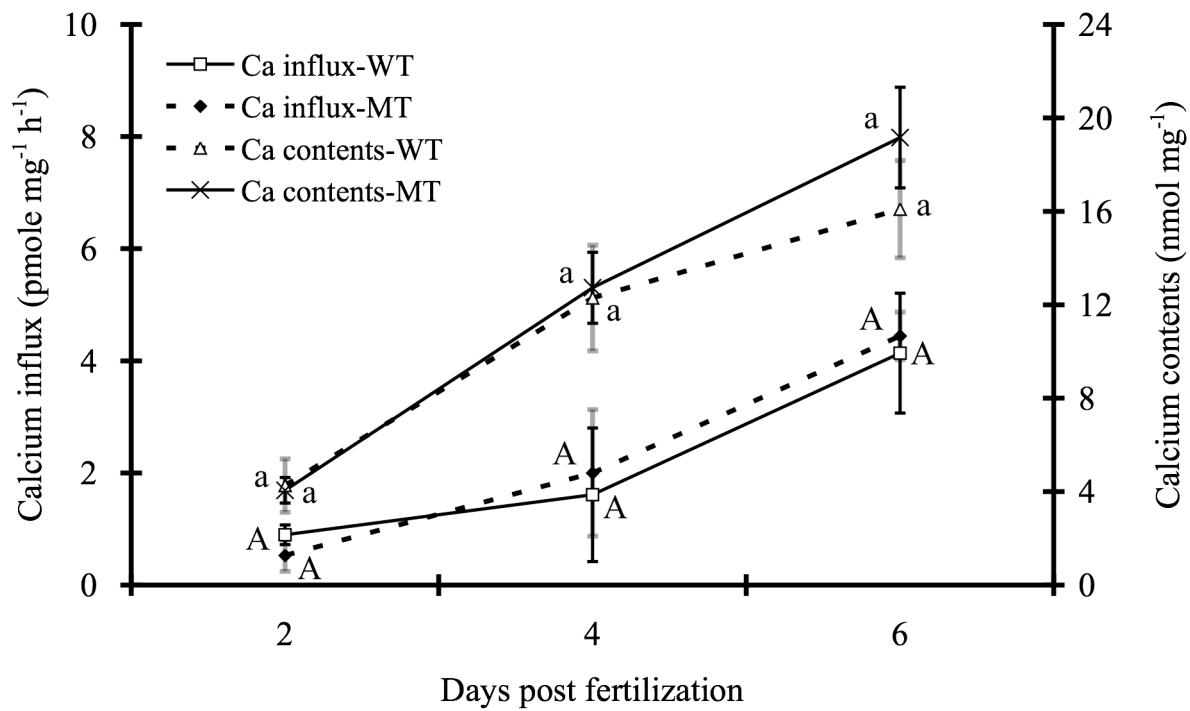

Supplement: jeb022798-sup-022798-figs2.pdf [file jeb022798-sup-022798-figs2.pdf]
